# Supplementary material for: Morphological Changes of 3T3 Cells under Simulated Microgravity
Source: MDPI journal article supplement (doi:10.3390/cells13040344), 2024-02-15

### Supplementary data

#### 1. FSC value

Supplementary Table S1. FSC value was analyzed by Accuri C6 Plus Flow Cytometer

|     | FSC value |          |
|-----|-----------|----------|
| No. | Control   | SMG      |
| 1   | 9913640   | 10599481 |
| 2   | 9422590   | 10308102 |
| 3   | 8755613   | 10204156 |
| 4   | 9715873   | 10481732 |
| 5   | 9559523   | 10413872 |

## 2. Nuclear intensity

Supplementary Table S2. Nuclear intensity value was analyzed by Cell Cyle App. of Cytell Microscope.

| No. | Control | SMG  |
|-----|---------|------|
| 1   | 1.31    | 1.40 |
| 2   | 1.23    | 1.27 |
| 3   | 1.32    | 1.33 |
| 4   | 1.27    | 1.27 |
| 5   | 1.39    | 1.32 |
| 6   | 1.34    | 1.28 |
| 7   | 1.41    | 1.25 |
| 8   | 1.41    | 1.17 |
| 9   | 1.41    | 1.22 |
| 10  | 1.45    | 1.32 |
| 11  | 1.38    | 1.28 |
| 12  | 1.50    | 1.29 |
| 13  | 1.39    | 1.36 |
| 14  | 1.33    | 1.30 |
| 15  | 1.31    | 1.36 |
| 16  | 1.30    | 1.36 |
| 17  | 1.37    | 1.32 |
| 18  | 1.40    | 1.37 |
| 19  | 1.34    | 1.34 |
| 20  | 1.25    | 1.28 |
| 21  | 1.32    | 1.32 |
| 22  | 1.39    | 1.27 |
| 23  | 1.36    | 1.32 |
| 24  | 1.41    | 1.31 |

### 3. Nuclear shape

Supplementary Table S3. Nuclear shape value was analyzed by Cell Cyle App. of Cytell Microscope.

| No. | Control | SMG   |
|-----|---------|-------|
| 1   | 0.924   | 0.926 |
| 2   | 0.923   | 0.923 |
| 3   | 0.927   | 0.930 |
| 4   | 0.928   | 0.924 |
| 5   | 0.928   | 0.928 |
| 6   | 0.927   | 0.929 |
| 7   | 0.929   | 0.927 |
| 8   | 0.935   | 0.928 |
| 9   | 0.932   | 0.928 |
| 10  | 0.932   | 0.931 |
| 11  | 0.935   | 0.934 |
| 12  | 0.934   | 0.926 |
| 13  | 0.932   | 0.923 |
| 14  | 0.930   | 0.923 |
| 15  | 0.929   | 0.923 |
| 16  | 0.928   | 0.931 |
| 17  | 0.933   | 0.925 |
| 18  | 0.932   | 0.928 |
| 19  | 0.929   | 0.931 |
| 20  | 0.932   | 0.924 |
| 21  | 0.927   | 0.922 |
| 22  | 0.931   | 0.925 |
| 23  | 0.933   | 0.928 |
| 24  | 0.930   | 0.924 |

#### 4. Nuclear area

Supplementary Table S4. Nuclear area was analyzed by Cell Cyle App. of Cytell Microscope.

| No. | Control | SMG    |
|-----|---------|--------|
| 1   | 211.41  | 214.50 |
| 2   | 221.56  | 218.71 |
| 3   | 210.17  | 214.38 |
| 4   | 222.97  | 227.58 |
| 5   | 197.87  | 212.53 |
| 6   | 199.87  | 212.92 |
| 7   | 199.91  | 219.16 |
| 8   | 195.04  | 224.95 |
| 9   | 195.13  | 212.37 |
| 10  | 195.05  | 207.09 |
| 11  | 206.56  | 214.66 |
| 12  | 198.82  | 217.60 |
| 13  | 202.68  | 215.58 |
| 14  | 210.03  | 214.55 |
| 15  | 210.85  | 213.69 |
| 16  | 201.72  | 207.64 |
| 17  | 204.52  | 220.27 |
| 18  | 194.36  | 209.90 |
| 19  | 212.81  | 205.90 |
| 20  | 218.90  | 218.09 |
| 21  | 209.74  | 218.53 |
| 22  | 190.96  | 215.36 |
| 23  | 205.63  | 215.77 |
| 24  | 206.24  | 227.17 |

5. Cell cycle progression analyzed by Cytell Microscope

Supplementary Table S5. Cell cycle progression analyzed by Cytell Microscope

| No. | Cell percentage |           |       |          |         |           |           |       |          |         |
|-----|-----------------|-----------|-------|----------|---------|-----------|-----------|-------|----------|---------|
|     | Control group   |           |       |          |         | SMG group |           |       |          |         |
|     | <2n (%)         | G0/G1 (%) | S (%) | G2/M (%) | >4n (%) | <2n (%)   | G0/G1 (%) | S (%) | G2/M (%) | >4n (%) |
| 1   | 1.17            | 63.2      | 10.8  | 19.5     | 5.29    | 1.09      | 62.2      | 12    | 19.5     | 5.25    |
| 2   | 1.5             | 64        | 10.1  | 20       | 4.48    | 1.69      | 66.8      | 11.4  | 15.8     | 4.29    |
| 3   | 1.01            | 63        | 10.5  | 20.3     | 5.23    | 1.38      | 65.2      | 11.2  | 17.6     | 4.68    |
| 4   | 1.01            | 61.6      | 10.9  | 21.8     | 4.73    | 1.37      | 63.1      | 12.5  | 18       | 5.03    |
| 5   | 0.86            | 65.4      | 9.54  | 19.4     | 4.81    | 1.01      | 66.8      | 11.4  | 16.2     | 4.53    |
| 6   | 1.34            | 65        | 11.2  | 18.5     | 4.01    | 3.56      | 66.5      | 11.2  | 14.9     | 3.81    |
| 7   | 0.88            | 62.4      | 11.4  | 20       | 5.28    | 2.4       | 66.9      | 11.1  | 15.4     | 4.26    |
| 8   | 0.68            | 65.2      | 10.5  | 19.5     | 4.1     | 3.56      | 68.7      | 11.1  | 13.2     | 3.48    |
| 9   | 0.66            | 64.5      | 10.8  | 19.6     | 4.38    | 4.12      | 68.9      | 10.9  | 12.9     | 3.21    |
| 10  | 1.14            | 62.3      | 11.6  | 20.2     | 4.83    | 2.29      | 68        | 10.8  | 15.1     | 3.84    |
| 11  | 1.12            | 63.2      | 11.1  | 20       | 4.6     | 1.78      | 68.4      | 11    | 15.4     | 3.39    |
| 12  | 1.16            | 57.3      | 15.2  | 20.6     | 5.78    | 1.68      | 66.1      | 11.6  | 16.3     | 4.26    |
| 13  | 0.77            | 63.1      | 9.85  | 21.4     | 4.97    | 0.95      | 63.5      | 11.2  | 18.8     | 5.53    |
| 14  | 0.73            | 63.3      | 9.9   | 21.6     | 4.49    | 1.54      | 66.3      | 10.6  | 17       | 4.53    |
| 15  | 1.08            | 63.3      | 10.3  | 20.4     | 4.87    | 1.71      | 64.9      | 10.2  | 18.1     | 5.19    |
| 16  | 1.41            | 66.9      | 9.5   | 18.3     | 3.84    | 1.63      | 66.8      | 10.8  | 16.5     | 4.21    |
| 17  | 1.19            | 62.3      | 12    | 19.4     | 5.15    | 1.25      | 64.7      | 11.7  | 17.3     | 4.96    |
| 18  | 0.85            | 66.6      | 9.71  | 18.6     | 4.22    | 1.37      | 65.7      | 11    | 17.2     | 4.77    |
| 19  | 0.73            | 62.5      | 10.8  | 20.8     | 5.14    | 1.16      | 68.5      | 10.7  | 15.7     | 3.92    |
| 20  | 2.45            | 62.2      | 11.5  | 19.7     | 4.09    | 1.65      | 66.4      | 10.9  | 16.4     | 4.72    |
| 21  | 1.27            | 64.7      | 11    | 18.9     | 4.08    | 1.32      | 65.4      | 10.3  | 17.8     | 5.13    |
| 22  | 1.19            | 67        | 9.59  | 17.8     | 4.36    | 1.22      | 69        | 10.6  | 15.1     | 4.11    |
| 23  | 0.96            | 63.4      | 10.9  | 20.4     | 4.33    | 1.16      | 66        | 11.3  | 17.1     | 4.44    |
| 24  | 0.94            | 60.3      | 12.1  | 21       | 5.65    | 1.28      | 62.5      | 12.8  | 17.5     | 5.98    |

## 6. Cell density

Supplementary Table S6. Cell density was analyzed by Cell Cyle App. of Cytell Microscope.

| No. | Cell number/well |       |
|-----|------------------|-------|
|     | Control          | SMG   |
| 1   | 14492            | 12977 |
| 2   | 16421            | 14299 |
| 3   | 16509            | 15478 |
| 4   | 14810            | 14187 |
| 5   | 15015            | 13580 |
| 6   | 16225            | 11818 |
| 7   | 12708            | 14100 |
| 8   | 14388            | 13522 |
| 9   | 15823            | 14778 |
| 10  | 12545            | 12277 |
| 11  | 13267            | 11869 |
| 12  | 12863            | 14425 |
| 13  | 15398            | 16449 |
| 14  | 15688            | 15111 |
| 15  | 16432            | 15532 |
| 16  | 17556            | 15265 |
| 17  | 15467            | 14784 |
| 18  | 15251            | 13222 |
| 19  | 14228            | 13822 |
| 20  | 14031            | 14776 |
| 21  | 14618            | 13057 |
| 22  | 16687            | 15021 |
| 23  | 15756            | 13034 |
| 24  | 13052            | 13468 |

## 7. Western blot analysis

### 7.1. Actin

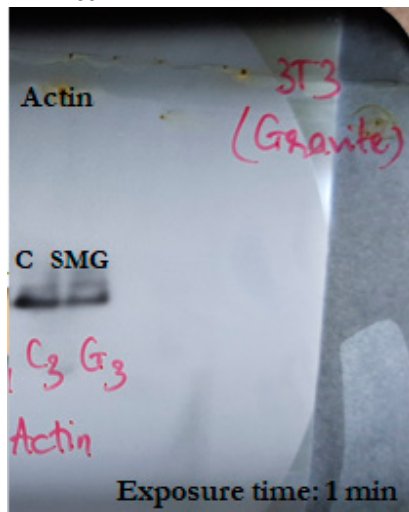

### 7.2. Tubulin

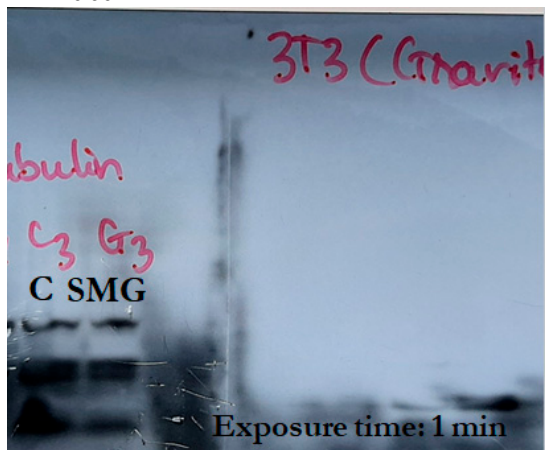

### 7.3. Cdk4

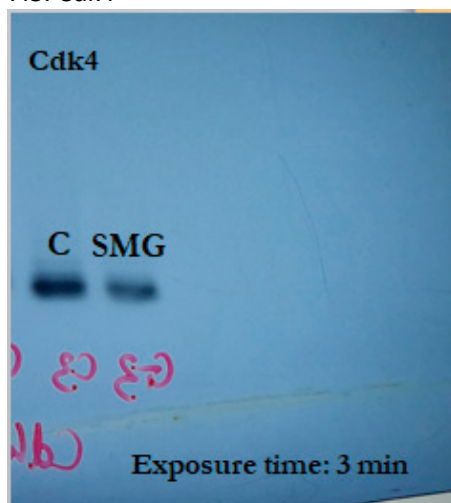

#### 7.4. Cdk6

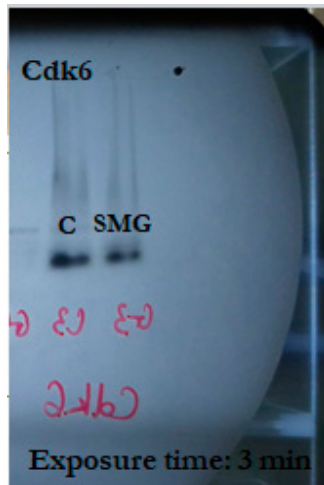

#### 7.5. Gapdh

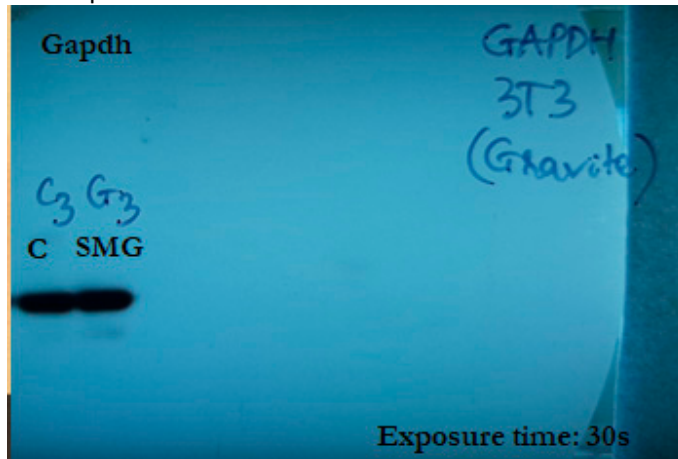

Supplement: s1 [file s1]
